# Supplementary material
Source: PubMed Central journal article supplement (PMC10269058)

SUPPLEMENTARY FILE: Images shown in advertisement experiment

A. Control

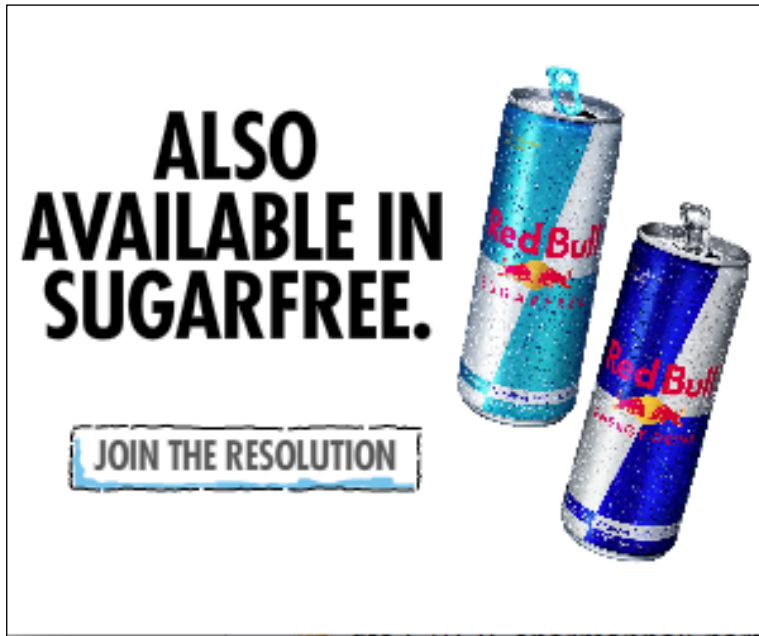

B. 'Gym'

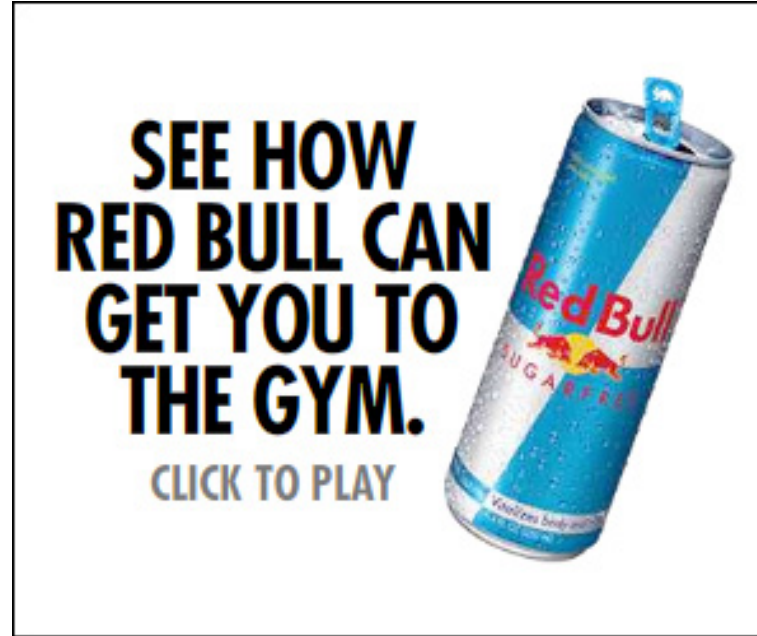

C. 'X Games'

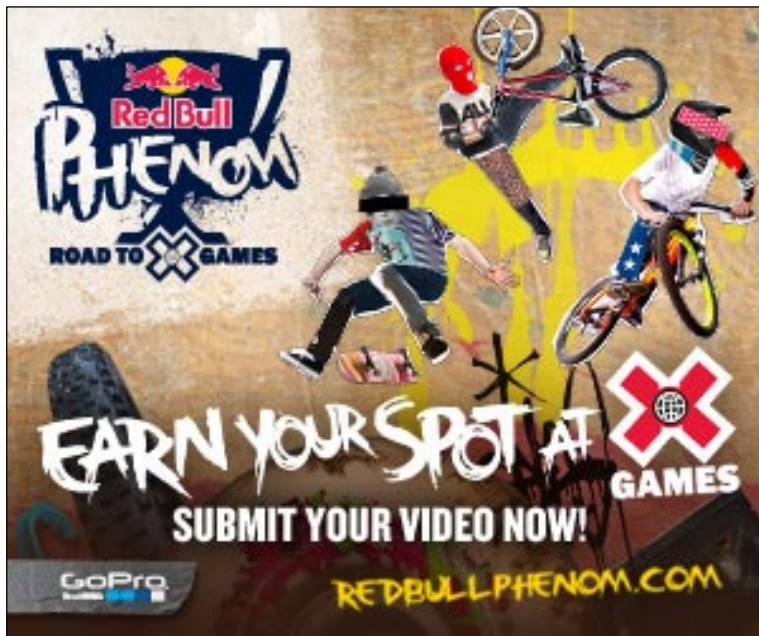

D. 'Snowboard'

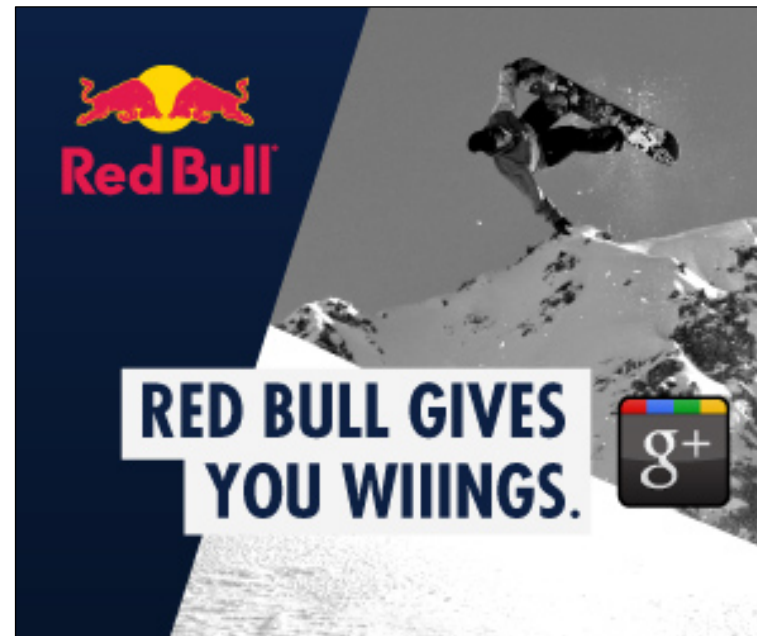

Supplement: S1368980017002890sup001.pdf [file S1368980017002890sup001.pdf]
